# Rspo1/Wnt signaling promotes angiogenesis via Vegfc/Vegfr3

Aniket V. Gore<sup>1</sup>, Matthew R. Swift<sup>1,\*</sup>, Young R. Cha<sup>1,\*</sup>, Brigid Lo<sup>1</sup>, Mary C. McKinney<sup>1,†</sup>, Wenling Li<sup>2</sup>, Daniel Castranova<sup>1</sup>, Andrew Davis<sup>1</sup>, Yoh-suke Mukouyama<sup>2</sup> and Brant M. Weinstein<sup>1,§</sup>

## SUMMARY

Here, we show that a novel Rspo1-Wnt-Vegfc-Vegfr3 signaling pathway plays an essential role in developmental angiogenesis. A mutation in *R-spondin1* (*rspo1*), a Wnt signaling regulator, was uncovered during a forward-genetic screen for angiogenesis-deficient mutants in the zebrafish. Embryos lacking *rspo1* or the proposed *rspo1* receptor *kremen* form primary vessels by vasculogenesis, but are defective in subsequent angiogenesis. Endothelial cell-autonomous inhibition of canonical Wnt signaling also blocks angiogenesis in vivo. The pro-angiogenic effects of Rspo1/Wnt signaling are mediated by Vegfc/Vegfr3(Flt4) signaling. Vegfc expression is dependent on Rspo1 and Wnt, and Vegfc and Vegfr3 are necessary to promote angiogenesis downstream from Rspo1-Wnt. As all of these molecules are expressed by the endothelium during sprouting stages, these results suggest that Rspo1-Wnt-Vegfc-Vegfr3 signaling plays a crucial role as an endothelial-autonomous permissive cue for developmental angiogenesis.

**KEY WORDS:** Angiogenesis, Vegfc, Zebrafish

## INTRODUCTION

The Wnt and vascular endothelial growth factor (VEGF) signaling pathways are highly conserved mediators of cell fate specification and patterning (Rossant and Howard, 2002). VEGF signaling plays a well-documented central role in the vasculature, regulating endothelial specification, differentiation, migration and survival during angiogenesis and lymphangiogenesis (Olsson et al., 2006). Wnt signaling has also been implicated in endothelial function. Many Wnt signaling molecules are expressed in the developing vessels, and studies carried out in vitro using cultured endothelial cells have documented effects of Wnt signaling on endothelial proliferation, survival and migration (Franco et al., 2009; Liebner et al., 2008; Zerlin et al., 2008). Several in vivo studies on Wnt/ $\beta$ -catenin pathway signaling have also reported that this signaling pathway regulates various aspects of cardiovascular development, including artery/vein specification, blood-brain barrier formation and vascular smooth muscle integrity (Cohen et al., 2008; Corada et al., 2010; Hurlstone et al., 2003; Shu et al., 2002; Stenman et al., 2008). However, targeted disruption of Wnt signaling genes in mice has not resulted in widespread dramatic defects in developmental angiogenesis, perhaps owing to extensive functional overlap between these genes, and the in vivo role of Wnt signaling in the vasculature and the identity of crucial downstream pathways remain unclear (Franco et al., 2009; Ishikawa et al., 2001; Monkley et al., 1996; Xu et al., 2004; Ye et al., 2009).

A variety of genes have been shown to influence the Wnt signaling pathway or its output by modulating activities of Wnt pathway members (Chen et al., 2007; Cohen et al., 2008; Junge et al., 2009). Among these, R-spondins are a family of secreted ligands (Rspo1–4) that have been shown to enhance Wnt signaling (Kim et al., 2008). Frizzled, LRP6 and a specific receptor called *kremen* are believed to act as a receptor complex for Rspo signaling (Binnerts et al., 2007; Kazanskaya et al., 2004; Kim et al., 2008; Nam et al., 2007; Wei et al., 2007), although their mechanism of action is not well understood (Binnerts et al., 2007; Kinzler et al., 1991; Nam et al., 2006; Wei et al., 2007). Different R-spondin family members have been shown to modulate a wide variety of functions in different tissues (Hendrickx and Leys, 2008; Kim et al., 2006), including in the vasculature. R-spondin 3 has been shown to promote expression of VEGFA in *Xenopus* and mouse embryos and to regulate endothelial specification and differentiation (Kazanskaya et al., 2008). Wnt signaling is also reported to promote expressions of VEGFA and VEGFC in cultured human endothelial and tumor cells (Skurk et al., 2005; Zhang et al., 2001). A recent study also reported that transgenic expression of an activated form of  $\beta$ -catenin affects vascular remodeling and arterial-venous specification by activating Dll4 expression and thus increasing Notch signaling (Corada et al., 2010). Dll4/Notch signaling regulates angiogenesis and tip cell specification in mouse and zebrafish embryos (Hellstrom et al., 2007; Lobov et al., 2007; Roca and Adams, 2007; Siekmann and Lawson, 2007). Despite these and other reports implicating Wnt signaling in various aspects of endothelial function, little is yet known about how its modulators affect blood vessel formation and vascular development in vivo.

Here, we show that a novel Rspo1-Wnt-Vegfc-Vegfr3 signaling pathway is essential for developmental angiogenesis. During embryogenesis, mesodermally derived endothelial progenitor cells (angioblasts) first come together to form the primary vascular bed by a process called vasculogenesis. The primary vascular bed subsequently undergoes remodelling, as well as sprouting and growth of new vessels from the pre-existing vessels by a process

<sup>1</sup>Program in Genomics of Differentiation, National Institute of Child Health and Human Development, National Institutes of Health, 6B/3B309, Bethesda, MD 20892, USA. <sup>2</sup>Laboratory of Stem Cell and Neuro-Vascular Biology, Genetics and Developmental Biology Center, National Heart, Lung, and Blood Institute, National Institutes of Health, 10/6C103, Bethesda, MD 20892, USA.

\*These authors contributed equally to this work

<sup>†</sup>Present address: Stowers Institute for Medical Research, 1000 E 50th St., Kansas City, MO 64110, USA

<sup>§</sup>Author for correspondence ([flyingfish2@nih.gov](mailto:flyingfish2@nih.gov))

called angiogenesis. Using a newly identified mutant in *rspo1* and variety of other methods for functionally manipulating different members of this pathway, we show that canonical Wnt signaling is required downstream of *rspo1* for endothelial sprouting angiogenesis. We also further show that *Rspo1*/Wnt signaling promotes sprouting angiogenesis by upregulating endothelial *vegfc* expression. Our results reveal a new signaling pathway required for developmental angiogenesis.

## MATERIALS AND METHODS

### Zebrafish strains and genetic mapping

*Tg(fli:EGFP)<sup>y1</sup>* fish were maintained on the EK background and used for ENU mutagenesis. Bulk segregant analysis and fine genetic mapping were carried out as described previously (Lawson et al., 2003). The *Tg(fli:nEGFP)<sup>y7</sup>* is reported elsewhere (Roman et al., 2002). The *Tg(flk:mCherry)<sup>y206</sup>* line was generated using a transgene construct in which cytoplasmic mCherry is driven by the endothelial *kdr/flk1* promoter (assembled using Gateway technology). The construct was injected into EK embryos and founders were screened for endothelial mCherry expression. The brightest mCherry-expressing transgenic zebrafish was propagated to establish the line. Zebrafish strains were maintained and bred, and embryos were staged as described elsewhere (Kimmel et al., 1995; Westerfield, 2000).

### Measuring endothelial cell proliferation, endothelial cell count and ISV phenotype

Endothelial cell numbers were counted using *Tg(fli:nEGFP)<sup>y7</sup>* transgenic zebrafish in which all endothelial cell nuclei are endogenously green fluorescent and can be easily counted. Mutant and wild-type embryos from the same clutch were mounted and trunk regions were imaged using 20× water immersion objective on an Olympus confocal microscope at described stages. Nuclei from the DA and CV of three middle trunk segments were counted from confocal *z*-stacks. At least ten embryos for each time point were imaged and counted for analysis. For dividing cells, mutant and sibling embryos derived from the *Tg(fli:nEGFP)<sup>y7</sup>* line were fixed and processed for immunohistochemistry as described below. Labeled embryos imaged as described above, except the yolk was removed before imaging. Phospho-histone H3-positive nuclei were counted from confocal *z*-stacks of the axial vessels (dorsal aorta and cardinal vein). For ISV phenotype quantitation, 11 segments rostral to the end of the yolk extension were counted per embryo from a minimum of eight embryos per treatment. Phenotypes were divided into three groups: no ISV sprouts, ISVs up to the horizontal myoseptum (half-way up the trunk) and ISVs up to the DLA (fully extended dorsally). For calculating statistical significance, numbers of ISV reaching the DLA were counted from at least two separate experiments each for control, *rspo1*, *krm1*, *vegfc*, *vegfa* or *vegfr3* morpholino-injected animals, or from *dt<sup>p135</sup>* or wild-type sibling animals. The results of replicate experiments were pooled and Student's *t*-test was applied to compare control morpholino or wild-type animals with other morpholino or *dt<sup>p135</sup>* mutant animals (supplementary material Table S1).

### Whole-mount in situ hybridization, immunohistochemistry and TUNEL labeling

Whole-mount in situ hybridization was carried out as described previously (Gore et al., 2008). Immunohistochemistry was carried out using polyclonal anti-phosphohistone H3 (1:200) or monoclonal F59, S54 and Eng (all at 1:10 from hybridoma bank) antibodies as described previously (Srinivas et al., 2007). Anti-mouse Cy3 and anti-rabbit Cy3 secondary antibodies (Jackson Laboratories) were used at 1:400 dilution. For detection of apoptosis, the in situ cell death detection kit (TMR) from Roche was used as described previously (Gore et al., 2008).

### Protein labeling and microinjections

Mouse R-spondin1/cristin 3 protein was purchased from R&D Systems. Alexa 555 microscale protein labeling kit was purchased from Invitrogen and labeling was carried out as per manufacturer's instructions. Microangiography was carried out on 24 hpf embryos as described

previously (Kamei et al., 2006; Weinstein et al., 1995). For trunk interstitial space injections, embryos were manually dechorionated and mounted in methylcellulose. A small bolus of labeled protein was injected between the somite boundaries at the 18- to 20-somite stages using a fine needle inserted into the trunk muscle.

### Plasmid DNA cloning

Endothelial specific *Tol2(Flk:mCherry-2A-vegfc)* and *Tol2(Flk:mCherry)* constructs were assembled using Gateway technology (Kwan et al., 2007; Provost et al., 2007; Villefranc et al., 2007).

### BIO drug treatment

A 100 mM stock solution of (2'*Z*,3'*E*)-6-bromoindirubin-3'-oxime (BIO; EMD biosciences, catalog number 361552) was prepared in DMSO and diluted in embryonic medium E3 to a final concentration of 0.5 mM. For early embryonic treatments, manually dechorionated embryos were placed in E3/BIO solution from high/dome stage (2/2.5 hpf) until shield stage (6 hpf), then fixed and processed for staining. For late-stage treatments, dechorionated embryos were placed in E3/BIO solution from 16 hpf to 40 hpf and analyzed at different stages by live imaging or staining. Embryos in E3 solution containing DMSO carrier alone were used as control for all experiments.

### Microinjections

Morpholinos were injected into one- to two-cell stage zebrafish embryos at the indicated doses, as described previously (Gore et al., 2008). Morpholinos used in the study are as follows: *rspo1* translation blocking MO (translation start site underlined), 5'-CCAGCGCCAGCAGTCC-CAAATGCAT-3'; *rspo1* exon 1 splice donor MO, 5'-AGAAACAT-CAGCACTCACTCCGTCT-3'; *rspo1* exon 4 splice acceptor MO, 5'-CTTAGATCACATTGGACTGCAAAAT-3'; *wnt2bb* translation blocking MO (Ober et al., 2006), 5'-GTGTGCCATATAAAAGTATTCCCCG-3'; *krm1* translation blocking MO (translation start site underlined), 5'-AAGCTGCGACTCTCCACGAATCCAT-3'; *krm1* 5' UTR MO, 5'-TGTAAGTCTGTGATCTGTCTGAGCTT-3'; *krm1* exon 1 splice donor MO, 5'-GGTTCCTGTGTGAGAAAAACAGACT-3'; *vegfc* translation blocking MO (translation start site underlined) (Ober et al., 2004), 5'-GAAAATCCAAATAAGTGCAATTTAG-3'; *flt4* splice donor MO (Covassin et al., 2006), 5'-TTAGGAAATGCGTTCTCACCTGAG-3'. Synthetic mRNA and plasmid DNA injections were carried out as described previously (Gore et al., 2008).

### Endothelial cell culture and treatments

Murine endothelial cell line MSS31 was kindly provided by Dr Yanai (Tohoku University, Japan) (Yanai et al., 1991) and cultured in  $\alpha$ -minimal essential medium ( $\alpha$ MEM, GIBCO) containing 10% FBS. For activation of Wnt signaling, cultured MSS31 endothelial cells were treated with 16 ng/ml Wnt3a (R&D) or with 6  $\mu$ M (2'*Z*,3'*E*)-6-bromoindirubin-3'-oxime (BIO; EMD biosciences) for 2 days.

### RT-PCR analysis

Total cellular RNA from morpholino injected embryos and cultured MSS31 endothelial cells was isolated using Trizol reagent and treated with DNase I. Total cDNA was synthesized using the ThermoScript or SuperScript III first-strand synthesis supermix kit (Invitrogen) and PCR analysis was carried out using Qiagen Top Taq PCR kit or by Qiagen One-Step RT-PCR kit. Primers used in this study can be found in Table S2 (supplementary material).

## RESULTS

### *dt<sup>p135</sup>* mutants have a specific defect in angiogenesis

We identified *down the tubes* (*dt<sup>p135</sup>*), a zebrafish mutant with a specific defect in angiogenesis, in a *Tg(fli-EGFP)<sup>y1</sup>* transgenic-based forward-genetic screen for vascular mutations. Initial vasculogenesis takes place normally in *dt<sup>p135</sup>* mutants. Primary vessels in the head (e.g. primordial hindbrain channels) and trunk (e.g. dorsal aorta, DA, posterior cardinal vein, PCV) are properly

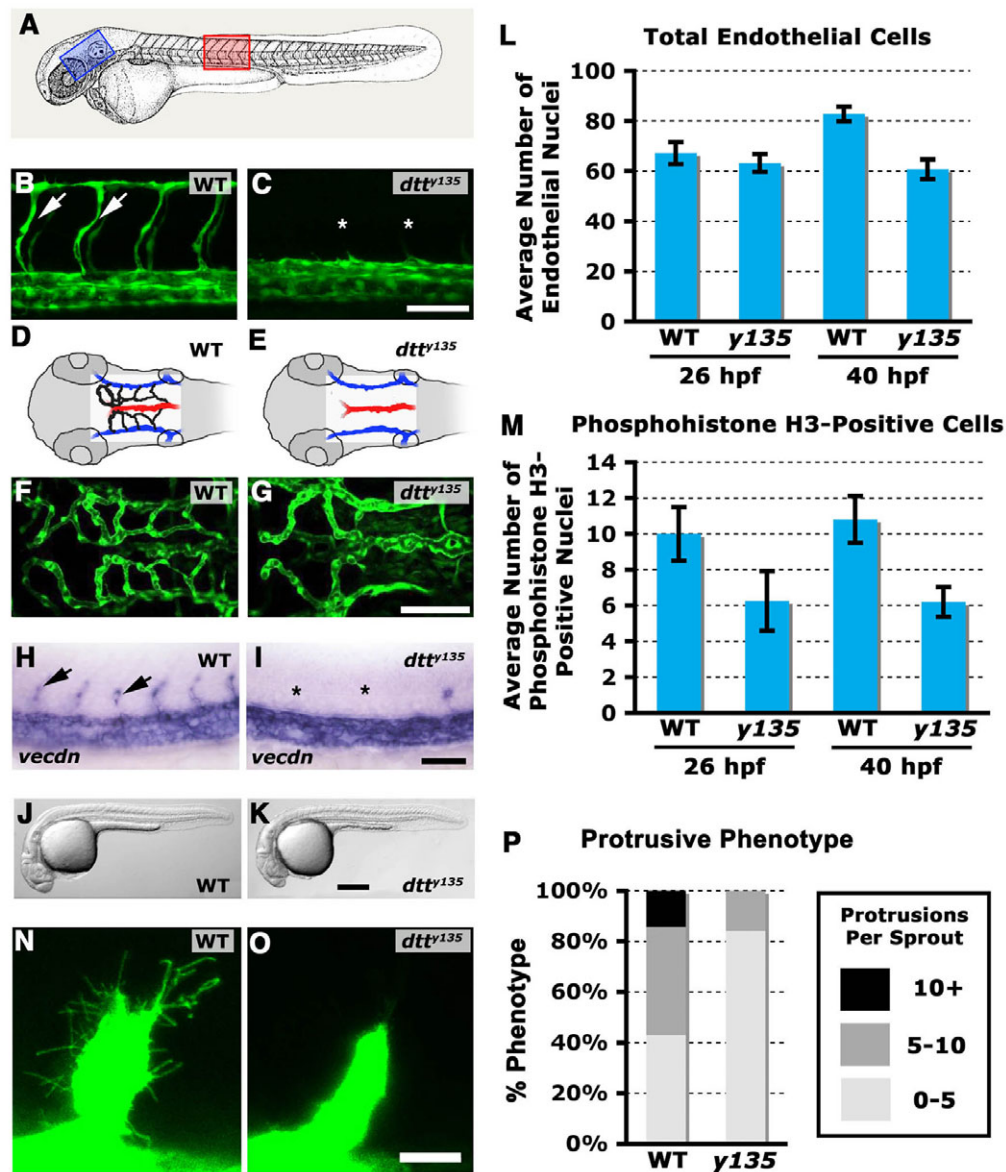

**Fig. 1.** *dtt<sup>y135</sup>* mutants have defects in angiogenesis, but not in endothelial specification or in vasculogenesis. (A) Diagram of a zebrafish embryo with the red box highlighting the region shown in B and C, and a blue box highlighting the region shown in D-G. (B,C) Confocal images of trunk vessels in 26 hpf *Tg(fli-EGFP)<sup>y1</sup>* wild-type sibling (B) and *dtt<sup>y135</sup>* mutant (C) zebrafish, showing normal formation of the vasculogenic dorsal aorta and posterior cardinal vein but failure to form the angiogenic intersegmental vessels (arrows in B, asterisks show absence in C) in *dtt<sup>y135</sup>* mutants (lateral views, anterior towards the left). (D,E) The hindbrain vessels imaged in F,G. Primordial hindbrain channels (PHBC) are in blue, basilar artery (BA) is in red and the central arteries (CA) are in black. (F,G) Confocal images of hindbrain vessels in 48 hpf *Tg(fli-EGFP)<sup>y1</sup>* wild-type sibling (F) and *dtt<sup>y135</sup>* mutant (G) zebrafish, showing normal formation of vasculogenic primary vessels, including the PHBC and BA, but failure to form the angiogenic CA that penetrate the hindbrain (dorsal views, anterior towards the left). (H,I) In situ hybridization of endothelium in the trunk of 26 hpf wild-type sibling (H) and *dtt<sup>y135</sup>* mutant (I) zebrafish with a probe for *vecdn*, showing normal expression levels in *dtt<sup>y135</sup>* mutants (lateral views, anterior towards the left). ISV are seen in wild-type siblings (arrows in H) but not in *dtt<sup>y135</sup>* mutants (asterisks in I). (J,K) Transmitted light images of 26 hpf *Tg(fli-EGFP)<sup>y1</sup>* wild-type sibling (J) and *dtt<sup>y135</sup>* mutant (K) zebrafish, showing reduced width of yolk extension but otherwise normal morphology of *dtt<sup>y135</sup>* mutants (J) compared with their wild-type siblings (K). Images are lateral views, anterior towards the left. Endothelial proliferation is reduced in *dtt<sup>y135</sup>* mutants. (L) Total number of endothelial cells present in the three posteriormost trunk segments, measured in *Tg(fli-nEGFP)<sup>y7</sup>* transgenic *dtt<sup>y135</sup>* mutant or wild-type sibling animals, at 26 hpf and 40 hpf. (M) Total number of phosphohistone H3-positive endothelial cells present in the three posteriormost trunk segments, measured in phosphohistone and GFP antibody-probed *Tg(fli-nEGFP)<sup>y7</sup>* transgenic *dtt<sup>y135</sup>* mutant or wild-type sibling animals, at 26 hpf and 40 hpf. Data are mean±s.e.m. (N,O) Higher-magnification confocal images of ISV sprouts in wild-type sibling (N) and *dtt<sup>y135</sup>* mutant (O) embryos at 20 hpf, showing reduced filopodial protrusions in mutants. (P) Total number of filopodia formed by control and mutant sprouts. Scale bars: 50 μm in B,C,F,G; 100 μm in H-K; 20 μm in N,O.

formed and carry normal circulatory flow (data not shown). By contrast, the subsequent growth of angiogenic vessels is strongly inhibited. Trunk intersegmental vessels (ISV) are either absent or

greatly reduced in number and length in 26 hpf *dtt<sup>y135</sup>* mutants compared with their wild-type siblings (Fig. 1A-C; see also Fig. 2L). There is some limited recovery of ISV later in development



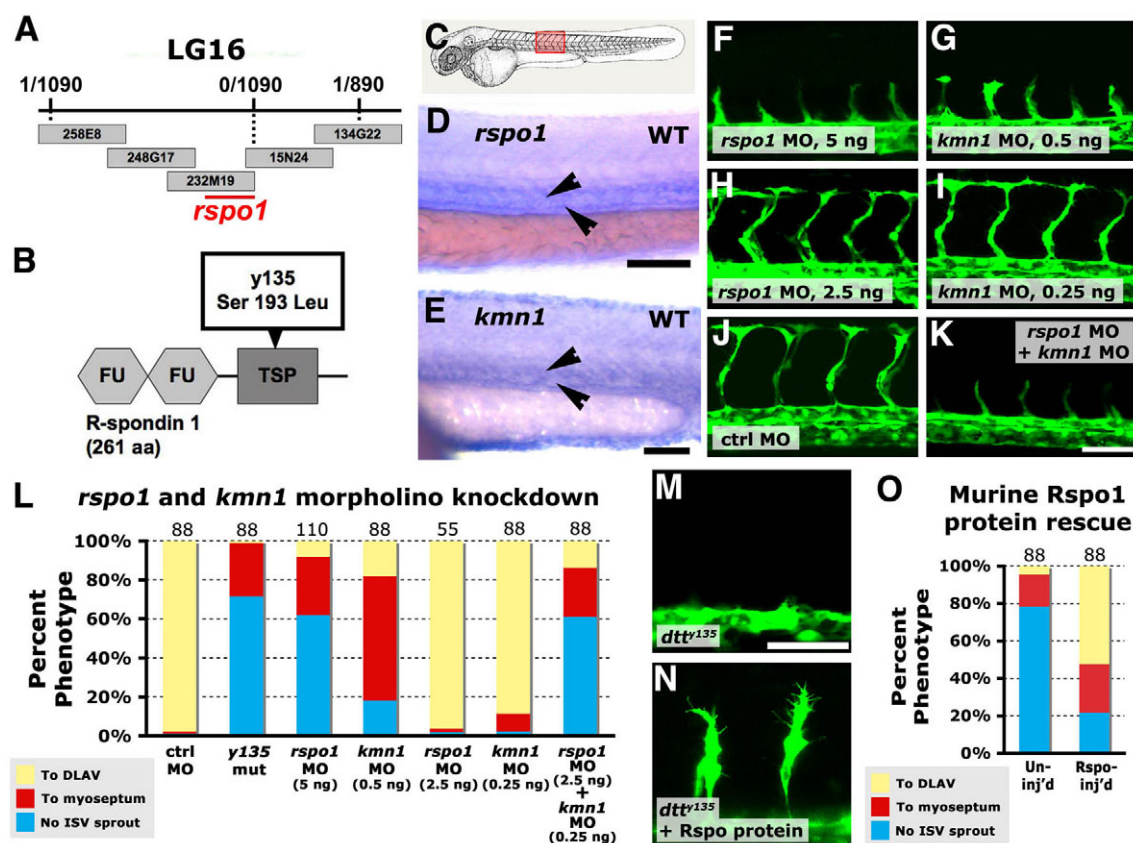

**Fig. 2. R-spondin 1 and its receptor kremen 1 are required together for angiogenesis.** (A) *dttY135* genetic interval on linkage group 16, with the number of recombinants per meiosis, position of BAC clones and position of the *rspo1* locus indicated. (B) Rspo1 protein domain structure, with two furin domains (FU) and a thrombospondin domain (TSP). The *dttY135* mutation changes serine 193 to leucine in the TSP domain. (C) A zebrafish embryo with the red box highlighting the region imaged in D-K. (D-E) In situ hybridization of the trunk of 24 hpf wild-type zebrafish embryos probed for *rspo1* (D) or *krm1* (E), with expression observed in the axial vasculature (arrowheads). (F-K) Confocal images of trunk vessels in 26 hpf *Tg(fli-EGFP)Y1* wild-type zebrafish injected with either 5 ng *rspo1* MO (F), 0.5 ng *krm1* MO (G), 2.5 ng *rspo1* MO (H), 0.25 ng *krm1* MO (I), 5 ng control MO (J) or 2.5 ng *rspo1* MO + 0.25 ng *krm1* MO (K). (L) Quantitation of the intersegmental vessel (ISV) phenotypes of 26 hpf *Tg(fli-EGFP)Y1 dttY135* mutant or morpholino-injected embryos. (M,N) Confocal images of ISV in 26 hpf *Tg(fli-EGFP)Y1 dttY135* mutant embryos that were either not injected (M) or were injected intramuscularly in the trunk with murine R-spondin (N). (O) Quantitation of the intersegmental vessel (ISV) phenotypes of uninjected or mouse R-spondin-injected *dttY135* zebrafish at 28 hpf. In L and O the bars show the percentages of ISV that have failed to sprout (blue), ISV that have grown only up to the horizontal myoseptum half way up the trunk (red) and ISV that have grown all the way to the dorsal trunk to form the DLAV (yellow). The number of segments counted is shown above each bar on the graphs. Scale bars: 100  $\mu$ m in D; 50  $\mu$ m in E; 50  $\mu$ m in F-K,M,N.

(after 2 dpf) but the vessels remain stunted and unable to form a complete trunk vascular network. The lymphatic network also fails to form in *dttY135* mutants, although this probably reflects the lack of a properly formed primary vasculature (data not shown). Cranial central arteries (Isogai et al., 2001) are also absent in 26 hpf *dttY135* mutants (Fig. 1D-G). Analysis of a variety of endothelial- or hematopoietic-specific markers reveals no defects in specification or differentiation of the endothelial or hematopoietic lineages (Fig. 1H,I; supplementary material Fig. S1), and no gross morphological defects, circulation defects or overall developmental delay are observed in *dttY135* mutants (Fig. 1J,K and data not shown). In addition to a defect in angiogenic sprouting and endothelial cell migration, *dttY135* mutants are also defective in angiogenic endothelial cell proliferation. *dttY135* mutants initially have a normal number of endothelial cells in the DA and CV, but, unlike wild-type siblings, the number of endothelial cells does not increase at later (40 hpf) stages of development (Fig. 1L). The number of phosphohistone H3-positive endothelial cells is also reduced in

mutant DA and CV compared with wild-type siblings (Fig. 1M). High-resolution imaging reveals that migration and protrusive activity of the angiogenic sprouts that do eventually form in *dttY135* mutants is substantially reduced (supplementary material Movies 1 and 2), with fewer filopodial structures (Fig. 1N-P). In addition to endothelial effects, *dttY135* mutants also show reduced skeletal musculature at later stages of trunk development. However, initial specification and patterning of muscle is normal (supplementary material Fig. S1).

### R-spondin 1 and kremen 1 are required together for angiogenesis

To examine the molecular nature of the *dttY135* phenotype, we positionally cloned the defective locus. The mutation maps to a sequenced interval on linkage group 16 containing the *R-spondin 1* (*rspo1*) gene (Fig. 2A). R-spondins are a family of secreted ligands (Rspo1-4) that have been shown to enhance Wnt signaling. Frizzled, LRP6 and a specific receptor called kremen are believed to act as a

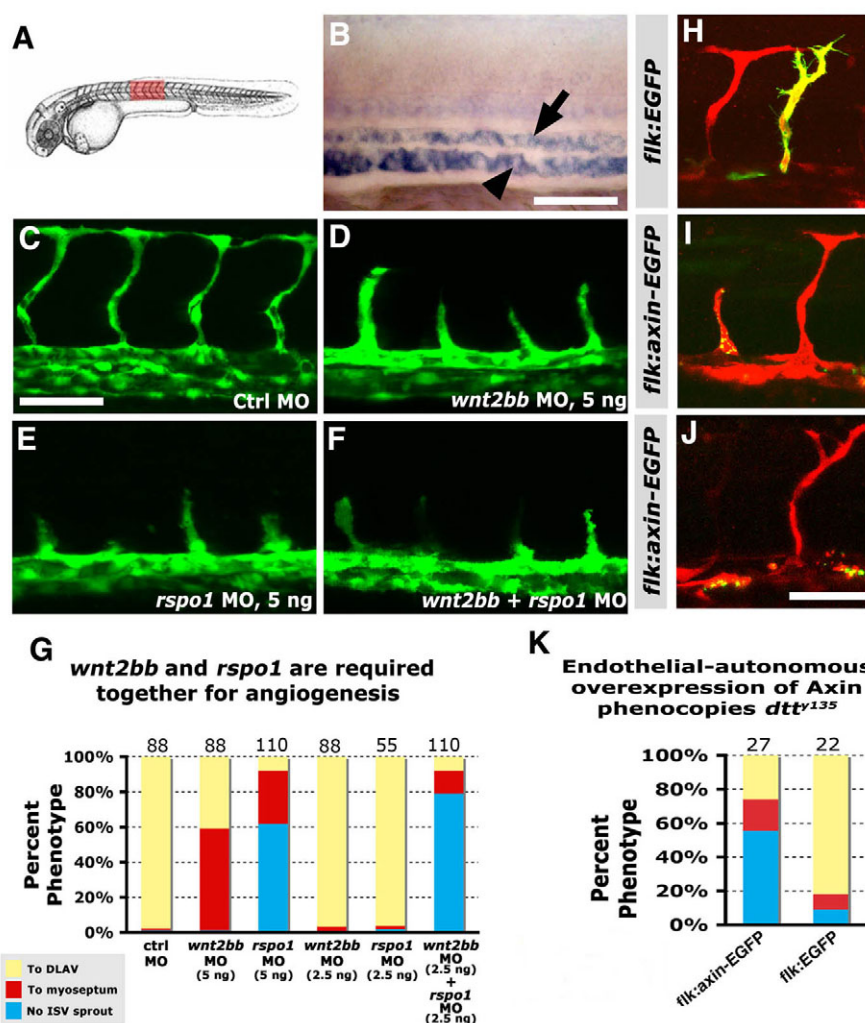

**Fig. 3. Canonical Wnt signaling is required endothelial cell-autonomously for angiogenesis.**

(A) Diagram of a zebrafish embryo with the red box highlighting the region shown in B-F,H-J. (B) In situ hybridization of the trunk of a 26 hpf wild-type zebrafish embryo probed for *wnt2bb*, showing expression in the axial vessels (dorsal aorta, arrow; posterior cardinal vein, arrowhead). Lateral view, anterior towards the left. (C-F) Confocal images of trunk vessels in 26 hpf *Tg(fli-EGFP)<sup>Y1</sup>* wild-type zebrafish injected with either 5 ng control MO (C), 5 ng *wnt2bb* MO (D), 5 ng *rspo1* MO (E) or 2.5 ng *wnt2bb* MO + 2.5 ng *rspo1* MO (F). (G) Quantitation of the intersegmental vessel (ISV) phenotypes of morpholino-injected wild-type 26 hpf *Tg(fli-EGFP)<sup>Y1</sup>* zebrafish. (H-J) Confocal images of trunk vessels in 26 hpf wild-type *Tg(fli-mCherry)* zebrafish (red) injected with DNA for either control *flk:EGFP* (H) or *flk:axin-EGFP* (I,J) expression constructs (green), showing defects in sprouting (J) or growth (I) of ISV expressing the axin-EGFP fusion protein. (K) Quantitation of the intersegmental vessel (ISV) phenotypes of endothelium expressing *flk:axin-EGFP* or control *flk:EGFP* expression constructs. In G and K bars show the percentages of ISV that have failed to sprout (blue), ISV that have grown only up to the horizontal myoseptum half-way up the trunk (red) and ISV that have grown all the way to the dorsal trunk to form the DLAV (yellow). The number of segments counted is shown above each bar. Scale bars: 50  $\mu$ m in B-F,H-J.

receptor complex for Rspo signaling (Binnerts et al., 2007; Kazanskaya et al., 2004; Kim et al., 2008; Nam et al., 2007; Wei et al., 2007), but their mechanism of action is not well understood (Binnerts et al., 2007; Kim et al., 2008; Wei et al., 2007). Sequence analysis of *rspo1* cDNA from *dtf*<sup>135</sup> mutants and their wild-type siblings reveals a C-to-T point mutation leading to a polar (serine) to non-polar (leucine) amino acid change at position 193 of the protein (Fig. 2B). Three additional lines of evidence confirm that the mutation in *rspo1* is responsible for the *dtf*<sup>135</sup> phenotype. First, *rspo1* and its presumptive receptor *kremen1* (*krm1*) are both expressed in the early zebrafish vasculature, consistent with a vascular function (Fig. 2C-E; supplementary material Fig. S2). The earliest vascular expression of *rspo1* is detected during active stages of ISV sprouting. Second, injection of any one of three different antisense morpholino oligonucleotides (MO) targeting either *rspo1* or *krm1* transcripts at the translational start site or exon-intron splice sites (supplementary material Fig. S3) reproducibly phenocopies the angiogenesis phenotypes of *dtf*<sup>135</sup> mutants (Fig. 2F,G,J,L). Co-injection of lower doses of *rspo1* and *krm1* morpholinos, that on their own fail to elicit a phenotype, results in a dramatic defective ISV phenotype (Fig. 2H,I,K,L;  $P < 0.0038$ ; supplementary material Table S1), providing evidence that *rspo1* and *krm1* function together during angiogenesis. Third, a single injection of murine Rspo1/cristin 3 protein into the trunk interstitial spaces partially rescues the ISV phenotypes of *dtf*<sup>135</sup> mutants (Fig. 2M-O).

### Canonical Wnt signaling is required endothelial cell-autonomously for angiogenesis

As noted above, previous data has suggested that Rspo/kremen signaling functions upstream from or together with the Wnt signaling pathway. During early embryogenesis, a large number of Wnt ligands are expressed in and around the developing vasculature. None of these Wnt ligands have been reported to show a strong vascular phenotype, however, suggesting that multiple Wnt ligands may contribute together to endothelial signaling in conjunction with Rspo1 in the developing trunk. We reasoned that if Rspo1 signaling is acting via the Wnt pathway then reduction of some of these Wnt ligands might show synergistic effects in combination with *rspo1* knockdown. We chose the Wnt ligand *wnt2bb* to test this because a previous report (Ober et al., 2006) showed that *wnt2bb* is expressed in endothelial cells during early stages of zebrafish embryogenesis, although its function is required for liver specification at later stages (see also Fig. 3A,B). We found that in addition to these later liver defects, *wnt2bb* knockdown also causes defects in ISV sprouting and growth, although these defects are not as severe as those found in *dtf*<sup>135</sup> mutants or *rspo1* morphants (Fig. 3C-G). However, co-injection of lower doses of *rspo1* and *wnt2bb* morpholinos that fail to elicit a phenotype on their own results in a severe ISV phenotype (Fig. 3F,G;  $P < 0.0049$ ; supplementary material Table S1), suggesting that *rspo1* and *wnt2bb* are also required together for angiogenesis. To examine whether Wnt signaling is required cell-autonomously in



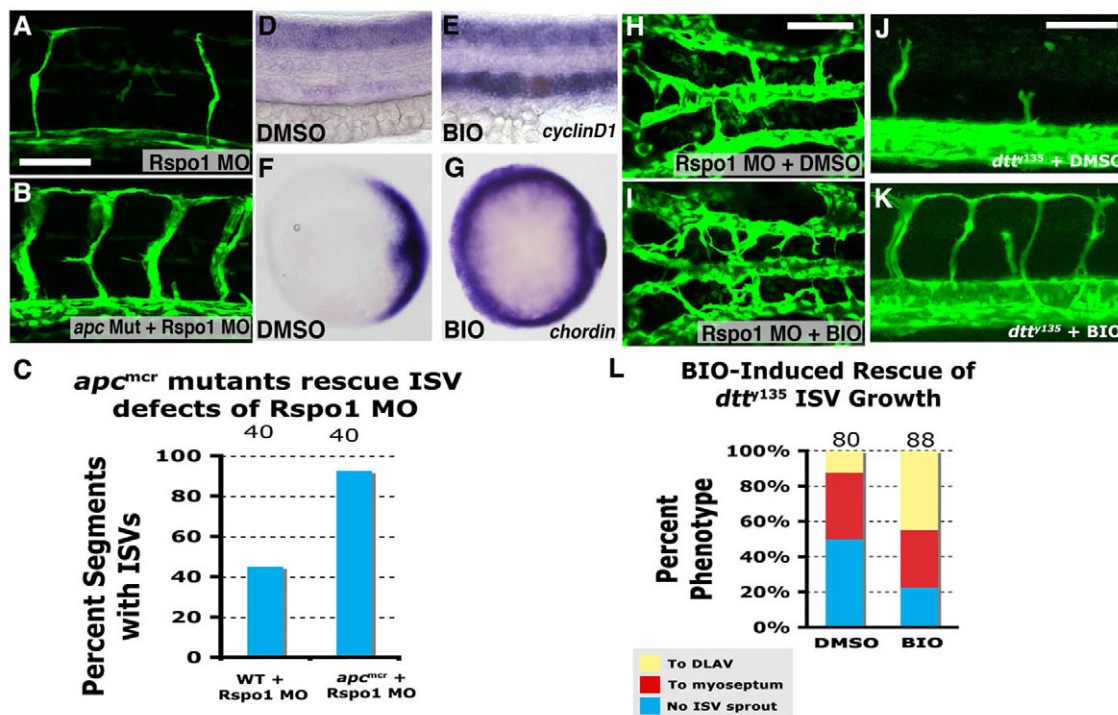

**Fig. 4. Upregulation of the Wnt/ $\beta$ -catenin pathway promotes angiogenesis.** (A,B) Confocal images of trunk vessels in 48 hpf *Rspo1* MO-injected wild-type (+/+) or heterozygous (*apc<sup>mcr</sup>/+*) embryo with ISV defects (A) or homozygous (*apc<sup>mcr</sup>/apc<sup>mcr</sup>*) mutant (B) with relatively normal ISV growth. (C) Quantitation of ISV phenotype of *Rspo1* MO-injected wild type (+/+) or heterozygous (*apc<sup>mcr</sup>/+*) embryo and homozygous (*apc<sup>mcr</sup>/apc<sup>mcr</sup>*) mutant. (D,E) In situ hybridization of the trunks of 26 hpf wild-type zebrafish embryos treated from 16 hpf to 24 hpf with either carrier DMSO (D) or BIO (E), probed for *cyclin D1*. (F,G) In situ hybridization of the trunks of 6 hpf wild-type zebrafish embryos treated from 2.5 hpf to 6 hpf with either carrier DMSO (F) or BIO (G), probed for *chordin*. (H,I) Confocal images of hindbrain vessels in 48 hpf *Rspo1* MO-injected embryos treated with carrier DMSO (H) or BIO (I). (J,K) Confocal images of trunk vessels in 40 hpf *dt<sup>y135</sup>* mutant embryos treated with carrier DMSO (J) or BIO (K) from 16 hpf. (L) Quantitation of the intersegmental vessel (ISV) phenotypes of 40 hpf *Tg(fli:EGFP)<sup>y1</sup>* *dt<sup>y135</sup>* mutants treated from 16–40 hpf with either DMSO carrier or BIO. Bars show the percentages of ISV that have failed to sprout (blue), ISV that have grown only up to the horizontal myoseptum half-way up the trunk (red) and ISV that have grown all the way to the dorsal trunk to form the DLAV (yellow). The number of segments counted is shown above each bar. Scale bars: 50  $\mu$ m in A,H,J.

the endothelium, we inhibited Wnt/ $\beta$ -catenin signaling in vivo by transgenic endothelial overexpression of Axin. Axin is a negative regulator of Wnt signaling that forms a complex with GSK3 $\beta$  and APC, marking  $\beta$ -catenin for destruction in the absence of active Wnt signaling (reviewed by Angers and Moon, 2009). We expressed Axin-EGFP fusion protein using the endothelial-specific *flk* promoter. Unlike endothelial cells expressing the control *flk:EGFP* transgene (Fig. 3H,K), *flk:axin-EGFP* transgene-expressing endothelial cells either failed to form ISV sprouts or formed stunted ISVs (Fig. 3I–K), as observed upon depletion of Wnt2bb, kremen or *Rspo1* proteins. These data indicate that endothelial cell-autonomous Wnt/ $\beta$ -catenin signaling is required for in vivo angiogenesis.

To confirm that activation of Wnt/ $\beta$ -catenin signaling is required downstream from *Rspo1* function during angiogenesis, we examined zebrafish homozygous for *apc<sup>mcr</sup>*, a mutation previously shown to promote maintenance of active Wnt/ $\beta$ -catenin signaling by reducing degradation of  $\beta$ -catenin (Haramis et al., 2006; Hurlstone et al., 2003). We injected *rspo1* morpholinos into embryos derived from *apc<sup>mcr</sup>/+* incrosses (Fig. 4A–C). *Rspo1* MO-injected wild type (+/+) or heterozygous (*apc<sup>mcr</sup>/+*) embryos showed reduced ISV formation (Fig. 4A,C), but *rspo1* MO-injected homozygous (*apc<sup>mcr</sup>/apc<sup>mcr</sup>*) mutants developed relatively normal ISVs (Fig. 4B,C), showing that downstream activation of  $\beta$ -catenin signaling can rescue the angiogenic defects caused by loss of *Rspo1*. This was further

confirmed using treatment with BIO [(2'Z,3'E)-6-bromoindirubin-3'-oxime], a small cell-permeable drug that upregulates  $\beta$ -catenin signaling by inhibiting GSK3 $\beta$  (Meijer et al., 2003). Zebrafish embryos treated with BIO during blastula stages (2.5–6.0 hpf) ectopically express the dorsal marker *chordin*, as expected for early upregulation of Wnt signaling, whereas treatment during early somitogenesis increases vascular expression of known canonical Wnt/ $\beta$ -catenin target gene *cyclin D1* (*ccnd1*) (Shtutman et al., 1999) (Fig. 4D–G). BIO-treated *rspo1* MO-injected embryos show improved sprouting and elongation of cranial central arteries compared with DMSO control-treated animals (Fig. 4H,I), whereas BIO-treated *dt<sup>y135</sup>* mutant embryos show improved sprouting and elongation of trunk ISVs compared with DMSO control-treated *dt<sup>y135</sup>* mutants (Fig. 4J–L). Activation of Wnt/ $\beta$ -catenin signaling in *apc<sup>mcr</sup>* mutants or BIO treatment of wild-type zebrafish embryos also promotes increased protrusive activity and branching of both trunk ISVs and cranial central arteries (supplementary material Fig. S4).

#### Expression of *Vegfc* is specifically affected in *dt<sup>y135</sup>* mutant embryos

Wnt signaling has been reported to promote expression of VEGFA (Kazanskaya et al., 2008) or VEGFA and VEGFC (Skurk et al., 2005) in cultured human endothelial cells, so we examined the expression of zebrafish VEGFs, and VEGF receptors and other

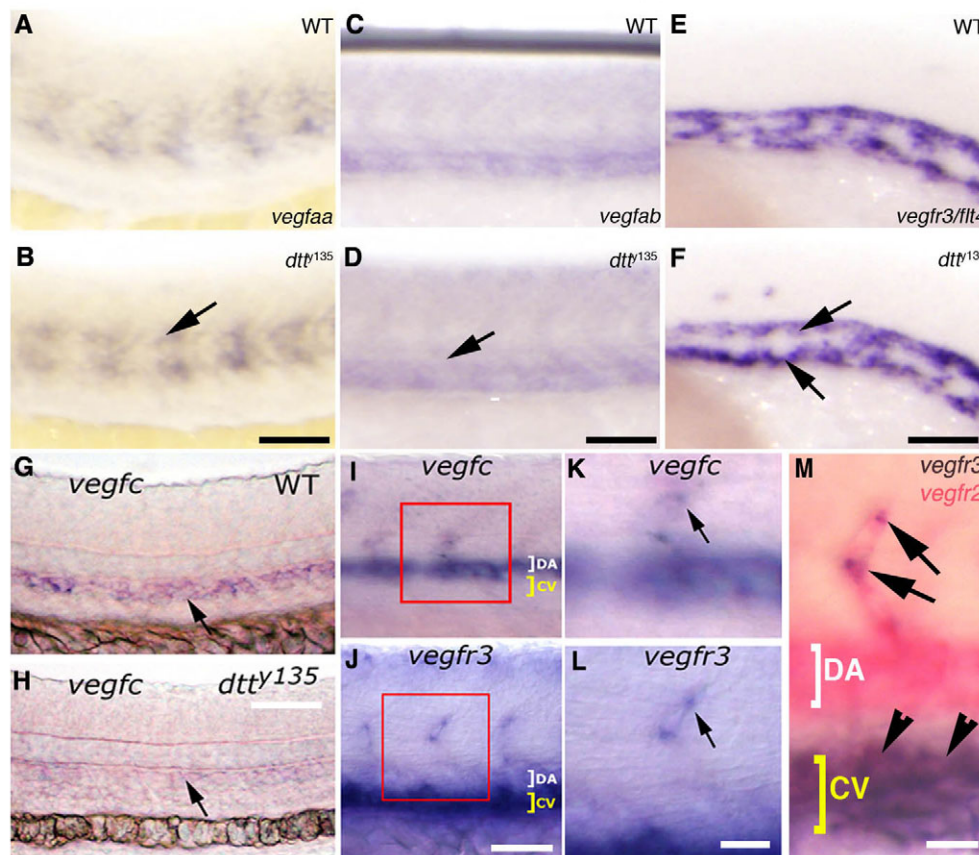

**Fig. 5. Expression of *Vegfc* is specifically affected in *dtt*<sup>135</sup> mutant embryos.** (A-F) In situ hybridization of the mid-trunk of wild-type sibling (A,C,E) and *dtt*<sup>135</sup> mutant (B,D,F) zebrafish embryos probed for *vegfaa* (A,B), *vegfab* (C,D) or *vegfr3* (E,F). The expression of *vegfaa* in the somites (arrow in B), *vegfab* in the axial vessels (arrow in D) and *vegfr3* in the axial vessels (arrows in F) does not change in *dtt*<sup>135</sup> mutant embryos compared with their wild-type siblings. (A-D) 24 hpf; (E,F) 20 hpf. (G,H) In situ hybridization of 26 hpf wild-type sibling (G) and *dtt*<sup>135</sup> mutant (H) embryos probed for *vegfc* (arrows). (I,K) In situ hybridization of 26 hpf wild-type embryos probed for *vegfc*, showing expression in the DA and ISV (K shows a magnified image of the boxed region in I). (J,L) In situ hybridization of 26 hpf wild-type embryos probed for *vegfr3*, showing expression in the CV and ISV tip cells (L shows a magnified image of the boxed region shown in J). (M) Double in situ hybridization confirming expression of *Vegfr3/flt4* (purple) in the tip cell (arrows) in addition to the cardinal vein (arrowheads), when compared with expression of *Vegfr2/flk1* (pink) throughout the DA, CV and ISV. Scale bars: 50  $\mu$ m in B,D,F,G; 45  $\mu$ m in I,J; 25  $\mu$ m in K-M.

vascular marker genes, in *dtt*<sup>135</sup> mutants and their wild-type siblings. We found no change in the expression of *vegfaa*, *vegfab* or any of the VEGF receptors, including *vegfr3/flt4* (Fig. 5A-F; supplementary material Fig. S1), but noticed a strong decrease in expression of *vegfc* (Fig. 5G,H). *vegfc* has a dynamic expression pattern during early zebrafish development (Covassin et al., 2006; Ober et al., 2004). It is initially expressed in the hypochord, a trunk midline signaling structure located between the notochord and developing dorsal aorta (Covassin et al., 2006) (data not shown), but by 24 hpf *vegfc* becomes expressed exclusively in the adjacent dorsal aorta (Covassin et al., 2006) and, importantly, also in the growing ISV (Fig. 5G,I,K). Although *vegfc* is expressed in the hypochord at 18 hpf in *dtt*<sup>135</sup> mutants, which is indistinguishable from wild-type animals (data not shown), by 24 hpf its expression in the dorsal aorta is absent or strongly reduced (Fig. 5H). *vegfr3/flt4*, the presumptive zebrafish receptor for *vegfc*, is also expressed in the vasculature, first in the dorsal aorta and posterior cardinal vein (Fig. 5E), which also express *rspo1*. Later during development, *vegfr3/flt4* is expressed in posterior cardinal vein and growing ISV (Covassin et al., 2006; Hogan et al., 2009; Siekmann and Lawson, 2007) (Fig. 5K,L). We confirmed the tip cell

expression of *vegfr3/flt4* by performing double in situ hybridization (Fig. 5M). Similar *vegfc* expression by endothelial cells of the developing dorsal aorta and intersegmental vessels during mouse embryonic development was reported previously using a *lacZ* knock-in line (Tammela et al., 2008).

### Expression of *vegfc* is regulated by Wnt/ $\beta$ -catenin signaling

We examined whether *vegfc* expression is reduced in mutants other than *dtt*<sup>135</sup> with similar defects in ISV formation. *etsrp*<sup>y11</sup> and *flk*<sup>y17</sup> mutants, which are also defective in ISV formation, do not show reduced *vegfc* (Fig. 6A-D). To examine directly whether Wnt/ $\beta$ -catenin signaling regulates *vegfc* expression in endothelial cells in vitro, we treated mouse cultured endothelial cells with either Wnt/ $\beta$ -catenin signaling activator BIO or Wnt3a. Unlike control treatments, treatment with either BIO (Fig. 6E) or Wnt3a (Fig. 6F) activates *vegfc* expression in cultured mouse endothelial cells. Similarly, in zebrafish embryos, control DMSO-treated *rspo1* morphants failed to express *vegfc* in the dorsal aorta (Fig. 6G), but BIO-treated morphants regained dorsal aorta expression of *vegfc* (Fig. 6H). Importantly, we also noted that higher level *vegfc*



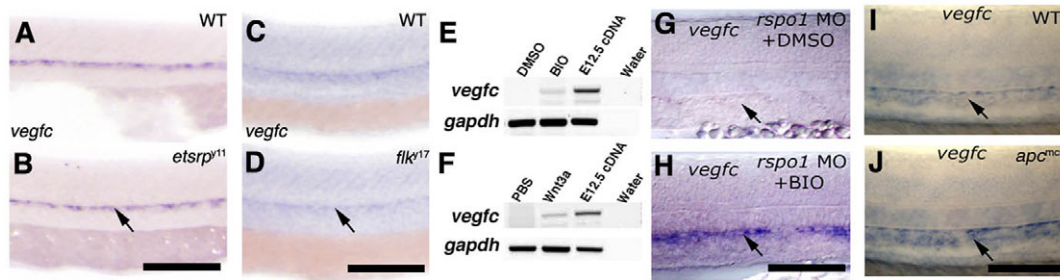

**Fig. 6. Expression of *vegfc* is specifically regulated by Wnt/ $\beta$ -catenin signaling.** (A–D) In situ hybridization of the mid-trunk of 24 hpf of wild-type sibling (A,C), *etsrp<sup>y11</sup>* mutant (B) and *flk<sup>y17</sup>* mutant (D) embryos, probing for *vegfc*. Arrows show *vegfc* expression in the dorsal aorta, which is not affected in the two mutants. (E,F) RT-PCR analysis showing expression of *vegfc* by cultured mouse endothelial cells upon treatment with BIO (E) or Wnt3a (F). (G,H) In situ hybridization of 26 hpf *rspo1* MO-injected embryos treated from 16–26 hpf with either 0.5% DMSO carrier (G) or 0.5  $\mu$ M BIO in DMSO (H), probed for *vegfc* (arrows). (I,J) In situ hybridization of 36 hpf wild-type sibling (I) or homozygous (*apc<sup>mcr</sup>/apc<sup>mcr</sup>*) mutant (J) embryos probed for *vegfc* (arrows). Scale bars: 50  $\mu$ m.

expression persists in the dorsal aorta at later stages of development in *apc<sup>mcr</sup>/apc<sup>mcr</sup>* mutant zebrafish when expression is reduced in their wild-type siblings (Fig. 6I,J).

### Vegfc signaling is required downstream of Rspo/Wnt signaling

As our results indicated Rspo1/Wnt signaling promotes *vegfc* expression in the endothelium, we carried out additional experiments to test whether Vegfc/Vegfr3 signaling is required for angiogenesis downstream from Rspo1/Wnt. Injection of synthetic *vegfc* mRNA rescued ISV sprouting defects in *dtf<sup>v135</sup>* mutant embryos, whereas similar injection of *vegfa1* mRNA failed to rescue (Fig. 7A–E), showing that exogenously supplied Vegfc, but not Vegfa, is sufficient to promote ISV sprouting in the absence of Rspo1. To determine whether endothelial-specific expression of *vegfc* can similarly rescue angiogenesis, we expressed either *vegfc* and mCherry together, or mCherry alone as a control, in *dtf<sup>v135</sup>* mutants using an endothelial-specific *flk* promoter (Fig. 7F–L). Endothelial cells expressing Vegfc and mCherry incorporated into normally sprouting and extending ISV (Fig. 7F–H,L), whereas endothelial cells expressing mCherry alone did not (Fig. 7I–L). These studies showed that *vegfc* is an essential component of Rspo1/Wnt downstream signaling required for sprouting angiogenesis.

Vegfc signaling is believed to function primarily through Vegfr3 expressed by the tip cells during angiogenic sprouting. Blocking Vegfr3-mediated Vegfc signaling in mice leads to reduced angiogenic sprouting and vascular density (Tammela et al., 2008). To test whether Vegfc and Vegfr3 are required downstream of Rspo1/Wnt signaling, we injected MOs targeting the *vegfc* or *Vegfr3/flt4* transcripts (Fig. 7M–S). Injections of full doses of these MOs resulted in absent or reduced ISV sprouting in wild-type embryos (Fig. 7M,N,S). Co-injection of low doses of either *vegfc* or *vegfr3/flt4* MOs, which, on their own, failed to elicit significant phenotype (Fig. 7O,P,S), together with sub-phenotypic doses of *rspo1* MO (Fig. 2H,L, Fig. 7S) yielded a strong effect on ISV sprouting and growth ( $P < 0.0001$ ; supplementary material Table S1), similar to that in *dtf<sup>v135</sup>* mutants (Fig. 7Q,S). Previous studies have reported a role for Notch signaling in angiogenesis and selection of endothelial tip cells (Hogan et al., 2009; Tammela et al., 2008). To examine whether Rspo1 signaling functions upstream of Notch, we injected *rspo1* or control MO into a *notch* reporter transgenic line (Parsons et al., 2009). Vascular expression of the *notch* reporter was equivalent in *rspo1* and control morphants (supplementary material Fig. S5). Furthermore, vascular expression of Notch pathway genes such as

*dll4*, *grl* (supplementary material Fig. S1) and *notch5* (data not shown) was unchanged in *dtf<sup>v135</sup>* mutants compared with their wild-type siblings. To determine whether Vegfc functions downstream from Notch, we examined *vegfc* expression following transgenic heat shock-inducible ubiquitous activation of Notch signaling, as we have reported previously (Lawson et al., 2001). The expression of *vegfc* was equivalent in Notch-activated and control embryos (supplementary material Fig. S5). These results suggest that Rspo-Wnt-Vegfc signaling functions independently from Notch signaling during embryonic angiogenesis.

## DISCUSSION

### Rspo1/Wnt signaling regulates angiogenesis

In this manuscript, we identify a novel signaling pathway essential for developmental angiogenesis. We provide multiple lines of evidence establishing the crucial role of Rspo1/Wnt signaling during developmental angiogenesis. Loss of Rspo1 function by means of genetic mutation or by morpholino mediated knockdown leads to suppression of angiogenic proliferation and to defects in both trunk and cranial vessel angiogenesis. Similarly, inhibiting functions of the presumptive receptor for R-spondin, kremen 1 (Binnerts et al., 2007) or the Wnt2bb ligand (both of which are expressed in the vasculature) also leads to defects in angiogenesis. Furthermore, inhibiting canonical Wnt/ $\beta$ -catenin pathway by transgenic overexpression of an Axin-GFP fusion protein under the control of the *kdr1/flk1* promoter leads to sprouting defects similar to those resulting from loss of Rspo1 function, indicating that Wnt signaling is required for angiogenesis in an endothelial-autonomous fashion. We also demonstrate that genetic (via *apc<sup>mcr</sup>* mutation) or chemically induced (via BIO treatment) activation of Wnt signaling rescues Rspo1 angiogenesis defects and promotes increased vascular branching and sprouting. As noted above, multiple studies have reported roles for canonical Wnt signaling in endothelial cells during development and disease (Dejana, 2010; Franco et al., 2009; Zerlin et al., 2008). Canonical Wnt signaling appears to be active in the endothelium during development (Maretto et al., 2003), and a variety of studies have reported important roles for this signaling pathway during distinct steps of vascular development, including endothelial cell fate specification and endothelial cell proliferation, and vascular growth, integrity and regression (Goodwin et al., 2007; Lieber et al., 2008; Liu and Nathans, 2008; Stenman et al., 2008; Wang et al., 2007). In addition to canonical Wnt signaling, a recent study also reported an important role for non-canonical Wnt-Flt1 signaling in myeloid cells regulating retinal angiogenesis



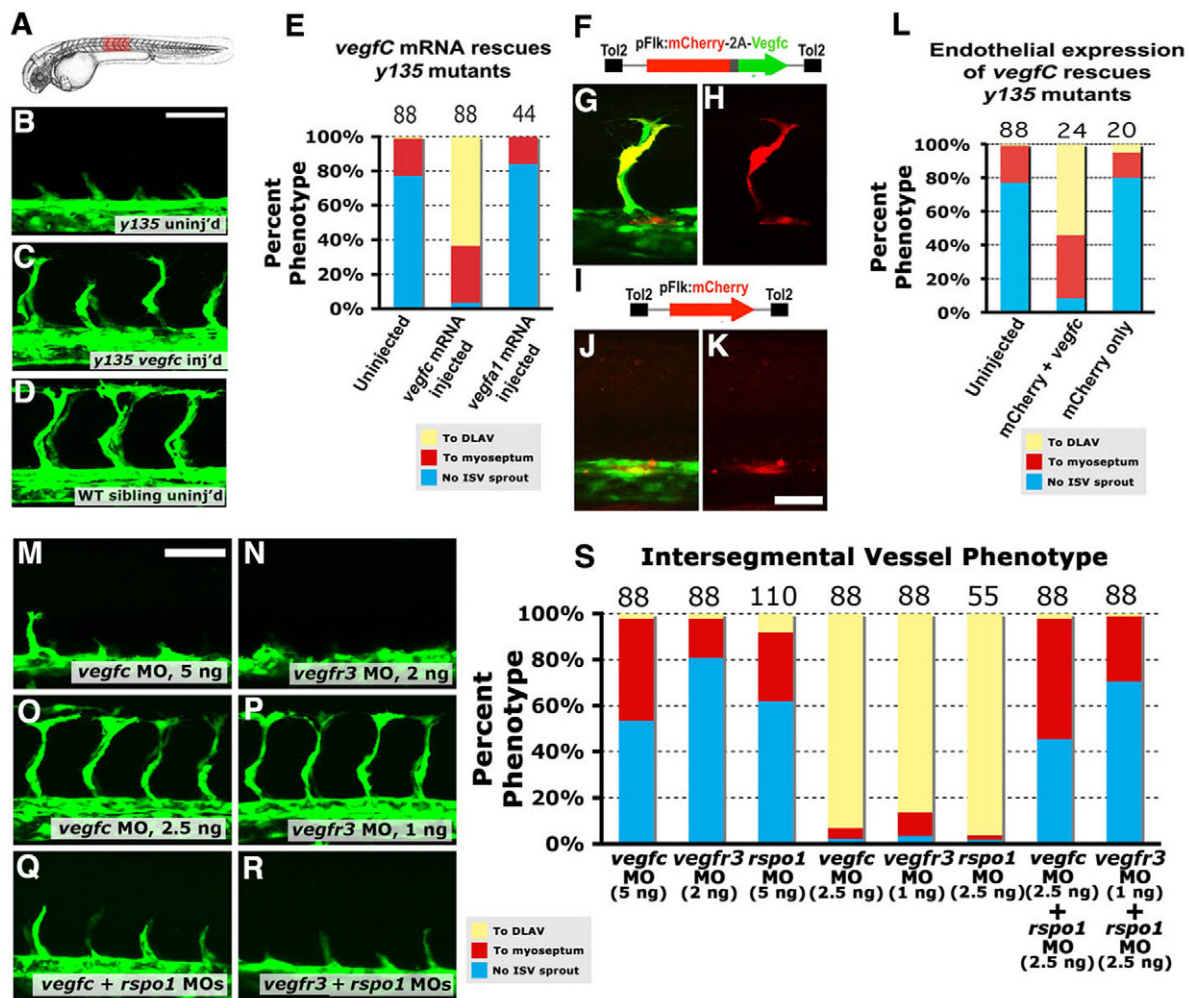

**Fig. 7. Vegfc signaling is required downstream of Rspo/Wnt signaling.** (A) Diagram of a zebrafish embryo with the red box highlighting the region shown in B-D. (B-D) Confocal images of the trunk vessels in 26 hpf *dtty<sup>135</sup>* mutant (B), *vegfc* mRNA-injected *dtty<sup>135</sup>* mutant (C) and uninjected wild-type sibling (D). (E) Quantitation of ISV growth phenotypes in 26 hpf uninjected and mRNA-injected zebrafish embryos. *P* values according to Student's *t*-test: *vegfc*, *P*<0.0001; *vegfa*, *P*<0.0187. (F-H) Rescued ISV sprouts in 26 hpf *Tg(fli-EGFP)<sup>y1</sup> dtty<sup>135</sup>* mutant zebrafish injected with a *Tol2(Flk:mCherry-2A-vegfc)* construct (F) for Flk promoter-driven endothelial expression of mCherry and *vegfc* separated by a viral 2A peptide sequence. (I-K) No rescue of ISV sprouting in 26 hpf *Tg(fli-EGFP)<sup>y1</sup> dtty<sup>135</sup>* mutant zebrafish injected with a *Tol2(Flk:mCherry)* *Tol2* construct (I) for Flk promoter-driven endothelial expression of mCherry reporter alone. (G,J) EGFP (green) and mCherry (red) combined fluorescence image. (H,K) Same fields as in G,J, viewing mCherry fluorescence alone. (L) Quantitation of ISV growth phenotypes in 26 hpf uninjected and *Tol2(Flk:mCherry-2A-vegfc)* or *Tol2(Flk:mCherry)* DNA-injected zebrafish embryos. The bars show the percentages of ISV that have failed to sprout (blue), ISV that have grown only up to the horizontal myoseptum half-way up the trunk (red) and ISV that have grown all the way to the dorsal trunk to form the DLAV (yellow). For DNA construct-injected animals in L, only mCherry-positive ISV phenotypes were assessed. The number of segments counted is shown above each bar on the graphs. (M-R) Confocal images of trunk vessels in 26 hpf *Tg(fli-EGFP)<sup>y1</sup>* wild-type zebrafish injected with either 5 ng *vegfc* MO (M), 2 ng *vegfr3* MO (N), 2.5 ng *vegfc* MO (O), 1 ng *vegfr3* MO (P), 2.5 ng *vegfc* + 2.5 ng *rspo1* MO (Q) or 1 ng *vegfr3* MO + 2.5 ng *rspo1* MO (R). (S) Quantitation of ISV growth phenotypes in 26 hpf different MO-injected zebrafish embryos. Color coding is the same as in L. Scale bars: 50  $\mu$ m in B,M; 25  $\mu$ m in K.

(Stefater et al., 2011). These studies underline the importance of this signaling pathway during vascular development. Our analysis of *dtty<sup>135</sup>* mutants and downstream Wnt signaling shows that Rspo1/Wnt signaling is essential for all developmental angiogenesis, although it is not required for vasculogenesis.

### Distinct roles of R-spondin family proteins during vascular development

R-spondin family proteins have been implicated in a diverse variety of developmental processes. Rspo2 regulates *Xenopus* muscle formation and tracheal and limb morphogenesis in mouse embryos

(Bell et al., 2008; Kazanskaya et al., 2004). Rspo3 is required for mouse placental development and for endothelial specification and differentiation (Aoki et al., 2007; Kazanskaya et al., 2008). In this manuscript, we report that Rspo1 is dispensable for initial vasculogenesis and endothelial specification and differentiation, but is instead absolutely required for subsequent developmental angiogenesis. Different R-spondins also appear to act via different signaling pathways. We find that Rspo1 promotes angiogenesis during early embryogenesis through canonical Wnt signaling and Vegfc. By contrast, Rspo3 is reported to bind to syndecan 4 and initiate non-canonical Wnt/PCP signaling pathway during

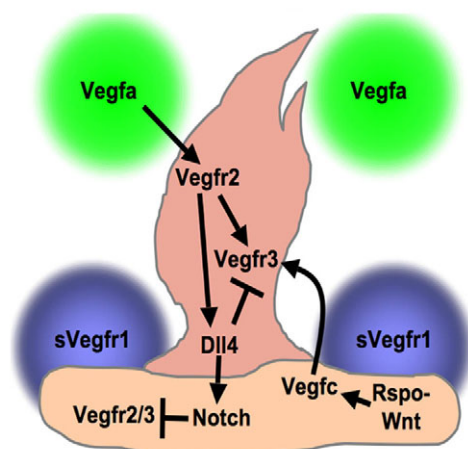

**Fig. 8. Schematic model for sprouting angiogenesis.** A proposed model for regulation of angiogenic sprouting based on this and previous studies. Our data showing endothelial-specific expression strongly suggest that the Rspo1-Wnt-Vegfc-Vegfr3 pathway functions in an endothelial-specific fashion. The diagram as drawn shows autocrine Rspo1 and paracrine Vegfc endothelial signaling, but we are not able to determine from the data presented in this manuscript whether signaling is autocrine, juxtacrine or both. However, the pan-endothelial (not tip- or stalk-restricted) expression of the components of this pathway suggests that it provides a permissive cue for angiogenesis, rather than a selective cue for tip cells. Other published studies have shown that Vegfa produced by surrounding tissue signals through Vegfr2 to induce Vegfr3 and Dil4 in the tip cell (Lobov et al., 2007; Tammela et al., 2008). Supporting stalk cells express soluble Flt1 (sVegfr1) and Notch. sVegfr1 helps sharpen the concentration gradient of available Vegfa to direct sprouting (Chappell et al., 2009), whereas Dil4/Notch signaling limits the number of tip cells specified (Hellstrom et al., 2007; Lobov et al., 2007; Siekmann and Lawson, 2007). Notch limits Vegf receptor expression in stalk cells and Dil4 suppresses Vegfr3 in the tip cell to inhibit hyperbranching (Hogan et al., 2009; Roca and Adams, 2007; Tammela et al., 2008).

gastrulation and cartilage formation, influencing clathrin-mediated endocytosis (Ohkawara et al., 2011). Rspo3 also promotes endothelial specification and differentiation via Vegfa (Kazanskaya et al., 2008), whereas our results show that Rspo1 acts via Vegfc. Expression of *vegfa1* and *vegfa2* genes is not affected in *rspo1* mutants, whereas expression of *vegfc* is strongly reduced, and this expression can be specifically restored by BIO-induced Wnt activation. The angiogenesis defects in *rspo1* mutants can be rescued by forced expression of *vegfc*, but not by *vegfa*, and can be phenocopied by knockdown of either *vegfc* or *vegfr3*. Thus, although it is likely that Rspo proteins use some common modes of action, in many cases these proteins may be using specialized mechanisms to regulate distinct developmental processes.

### Vegfc/Vegfr3 signaling during angiogenesis

Vegfc is best-known as a pro-lymphangiogenic ligand for the Vegfr3 receptor, but recent evidence has shown that Vegfc-Vegfr3 signaling also has a role in angiogenesis during early development. Vegfr3 is highly expressed in angiogenic sprouts, and conditional genetic targeting of Vegfr3 or blocking of Vegfr3 signaling with monoclonal antibodies results in decreased sprouting, vascular density, vessel branching and endothelial cell proliferation in mice (Tammela et al., 2008). Complete embryonic inactivation of Vegfr3 causes defective early blood vessel development in mice (Dumont et al., 1998). In agreement with our findings, previous studies using morpholino

knockdown of Vegfr3 or overexpression of soluble human Vegfr3 in the zebrafish also reported severe defects in blood vessel development (Covassin et al., 2006; Herbert et al., 2009; Ober et al., 2004). By contrast, a presumptive tyrosine phosphorylation-deficient zebrafish *vegfr3* missense mutant shows primary defects in lymphatic development but no angiogenesis defects (Hogan et al., 2009), although the authors of this study suggest that this may reflect 'very low-level, residual signaling in the presence of the I1042S mutation'. Overexpression of Vegfc during early murine development (prior to E16.5) is also highly angiogenic (Lohela et al., 2008). However, targeted inactivation of both known mouse Vegfr3 ligands (Vegfc and Vegfd) does not yield defects in blood vessel development analogous to those caused by loss of Vegfr3 (Haiko et al., 2008), suggesting that there are Vegfc/d-independent, or redundant, functions for Vegfr3 in murine blood vessel formation.

### A permissive endothelial cue for developmental angiogenesis

Together, our results provide genetic evidence for a novel Rspo1-Wnt-Vegfc signaling pathway required for developmental angiogenesis (Fig. 8). The fact that expression of *rspo1*, *krm1*, *wnt2bb*, *vegfc* and *vegfr3* is restricted to the vasculature during early development, and that endothelial-specific suppression of Wnt signaling phenocopies loss of Rspo1, suggests that this pathway serves as an endothelial-autonomous modulator of angiogenesis during embryogenesis. It remains to be determined whether the entire pathway can function in an autocrine fashion at the level of a single endothelial cell. Autocrine Vegfa signaling has been shown to promote endothelial maintenance and vascular homeostasis (Lee et al., 2007). Similarly, a Vegfc/Vegfr3 autocrine loop enhances tumor associated lymphangiogenesis and tumor progression in a murine tumor model (Matsuura et al., 2009). Vegfc is initially produced as a pro-Vegfc dimer that is proteolytically cleaved at its N- and C-terminus to generate multiple processed secreted forms. Indeed, reduced activity is associated with cleavage mutants that fail to properly process the pro-Vegfc dimer (Joukov et al., 1997). However, cleavage of pro-Vegfc does not appear to be essential for its secretion, as unprocessed pro-Vegfc and cleavage mutant forms of Vegfc are both secreted efficiently, although they have different abilities to bind and/or activate the Vegfr3 receptor (Joukov et al., 1997; Siegfried et al., 2003). Therefore, it is not possible using these data to distinguish between possible paracrine and autocrine modes of signaling.

Using our *in vivo* model, we have shown a complete requirement of Vegfc signaling for developmental angiogenesis downstream of Rspo1/Wnt pathway. As abnormal Wnt and Vegfc signaling is frequently seen in different tumors and tumor cell lines (Laakkonen et al., 2007; Polakis, 2007; Stacker et al., 2002), the novel Rspo-Wnt-VegfC-Vegfr3 pathway we have identified may play an important role during tumor angiogenesis and, potentially, other vascular pathologies.

### Acknowledgements

We thank Drs Igor Dawid, Karuna Sampath, Sudipto Roy and Ajay Chitnis, and the zebrafish community for sharing fish strains, reagents, protocols and discussions. We thank members of the Weinstein lab for technical help and critical suggestions. We also thank Drs Elisabetta Dejana and Monica Corada for sharing their unpublished results.

### Funding

This research was supported by the intramural program of the Eunice Kennedy Shriver National Institute of Child Health and Human Development [HD001011 to B.W.] and by the Leducq Foundation [to B.W.]. Deposited in PMC for release after 12 months.



## Competing interests statement

The authors declare no competing financial interests.

## Supplementary material

Supplementary material available online at

<http://dev.biologists.org/lookup/suppl/doi:10.1242/dev.068460/-/DC1>

## References

- Angers, S. and Moon, R. T. (2009). Proximal events in Wnt signal transduction. *Nat. Rev. Mol. Cell. Biol.* **10**, 468-477.
- Aoki, M., Mieda, M., Ikeda, T., Hamada, Y., Nakamura, H. and Okamoto, H. (2007). R-spondin3 is required for mouse placental development. *Dev. Biol.* **301**, 218-226.
- Bell, S. M., Schreiner, C. M., Wert, S. E., Mucenski, M. L., Scott, W. J. and Whitsett, J. A. (2008). R-spondin 2 is required for normal laryngeal-tracheal, lung and limb morphogenesis. *Development* **135**, 1049-1058.
- Binnerts, M. E., Kim, K. A., Bright, J. M., Patel, S. M., Tran, K., Zhou, M., Leung, J. M., Liu, Y., Lomas, W. E., 3rd, Dixon, M. et al. (2007). R-Spondin1 regulates Wnt signaling by inhibiting internalization of LRP6. *Proc. Natl. Acad. Sci. USA* **104**, 14700-14705.
- Chappell, J. C., Taylor, S. M., Ferrara, N. and Bautch, V. L. (2009). Local guidance of emerging vessel sprouts requires soluble Flt-1. *Dev. Cell* **17**, 377-386.
- Chen, Y., Hu, Y., Lu, K., Flannery, J. G. and Ma, J. X. (2007). Very low density lipoprotein receptor, a negative regulator of the wnt signaling pathway and choroidal neovascularization. *J. Biol. Chem.* **282**, 34420-34428.
- Cohen, E. D., Tian, Y. and Morrissey, E. E. (2008). Wnt signaling: an essential regulator of cardiovascular differentiation, morphogenesis and progenitor self-renewal. *Development* **135**, 789-798.
- Corada, M., Nyqvist, D., Orsenigo, F., Caprini, A., Giampietro, C., Taketo, M. M., Iruela-Arispe, M. L., Adams, R. H. and Dejana, E. (2010). The Wnt/beta-catenin pathway modulates vascular remodeling and specification by upregulating Dll4/Notch signaling. *Dev. Cell* **18**, 938-949.
- Covassin, L. D., Villefranc, J. A., Kacergis, M. C., Weinstein, B. M. and Lawson, N. D. (2006). Distinct genetic interactions between multiple Vegf receptors are required for development of different blood vessel types in zebrafish. *Proc. Natl. Acad. Sci. USA* **103**, 6554-6559.
- Dejana, E. (2010). The role of wnt signaling in physiological and pathological angiogenesis. *Circ. Res.* **107**, 943-952.
- Dumont, D. J., Jussila, L., Taipale, J., Lymboussaki, A., Mustonen, T., Pajusola, K., Breitman, M. and Alitalo, K. (1998). Cardiovascular failure in mouse embryos deficient in VEGF receptor-3. *Science* **282**, 946-949.
- Franco, C. A., Liebner, S. and Gerhardt, H. (2009). Vascular morphogenesis: a Wnt for every vessel? *Curr. Opin. Genet. Dev.* **19**, 476-483.
- Goodwin, A. M., Kitajewski, J. and D'Amore, P. A. (2007). Wnt1 and Wnt5a affect endothelial proliferation and capillary length; Wnt2 does not. *Growth Factors* **25**, 25-32.
- Gore, A. V., Lampugnani, M. G., Dye, L., Dejana, E. and Weinstein, B. M. (2008). Combinatorial interaction between CCM pathway genes precipitates hemorrhagic stroke. *Dis. Model. Mech.* **1**, 275-281.
- Haiko, P., Mäkinen, T., Keskkitalo, S., Taipale, J., Kärkkäinen, M. J., Baldwin, M. E., Stacker, S. A., Achen, M. G. and Alitalo, K. (2008). Deletion of vascular endothelial growth factor C (VEGF-C) and VEGF-D is not equivalent to VEGF receptor 3 deletion in mouse embryos. *Mol. Cell. Biol.* **28**, 4843-4850.
- Haramis, A. P., Hurlstone, A., van der Velden, Y., Begthel, H., van den Born, M., Offerhaus, G. J. and Clevers, H. C. (2006). Adenomatous polyposis coli-deficient zebrafish are susceptible to digestive tract neoplasia. *EMBO Rep.* **7**, 444-449.
- Hellstrom, M., Phng, L. K., Hofmann, J. J., Wallgard, E., Coultas, L., Lindblom, P., Alva, J., Nilsson, A. K., Karlsson, L., Gaiano, N. et al. (2007). Dll4 signalling through Notch1 regulates formation of tip cells during angiogenesis. *Nature* **445**, 776-780.
- Hendrickx, M. and Leyns, L. (2008). Non-conventional Frizzled ligands and Wnt receptors. *Dev. Growth Differ.* **50**, 229-243.
- Herbert, S. P., Huiskens, J., Kim, T. N., Feldman, M. E., Houseman, B. T., Wang, R. A., Shokat, K. M. and Stainier, D. Y. (2009). Arterial-venous segregation by selective cell sprouting: an alternative mode of blood vessel formation. *Science* **326**, 294-298.
- Hogan, B. M., Herpers, R., Witte, M., Helotera, H., Alitalo, K., Duckers, H. J. and Schulte-Merker, S. (2009). Vegfr/Flt4 signalling is suppressed by Dll4 in developing zebrafish intersegmental arteries. *Development* **136**, 4001-4009.
- Hurlstone, A. F., Haramis, A. P., Wienholds, E., Begthel, H., Korving, J., Van Eeden, F., Cuppen, E., Zivkovic, D., Plasterk, R. H. and Clevers, H. (2003). The Wnt/beta-catenin pathway regulates cardiac valve formation. *Nature* **425**, 633-637.
- Ishikawa, T., Tamai, Y., Zorn, A. M., Yoshida, H., Seldin, M. F., Nishikawa, S. and Taketo, M. M. (2001). Mouse Wnt receptor gene Fzd5 is essential for yolk sac and placental angiogenesis. *Development* **128**, 25-33.
- Isogai, S., Horiguchi, M. and Weinstein, B. M. (2001). The vascular anatomy of the developing zebrafish: an atlas of embryonic and early larval development. *Dev. Biol.* **230**, 278-301.
- Joukov, V., Sorsa, T., Kumar, V., Jeltsch, M., Claesson-Welsh, L., Cao, Y., Saksela, O., Kalkkinen, N. and Alitalo, K. (1997). Proteolytic processing regulates receptor specificity and activity of VEGF-C. *EMBO J.* **16**, 3898-3911.
- Junge, H. J., Yang, S., Burton, J. B., Paes, K., Shu, X., French, D. M., Costa, M., Rice, D. S. and Ye, W. (2009). TSPAN12 regulates retinal vascular development by promoting Norrin- but not Wnt-induced FZD4/beta-catenin signaling. *Cell* **139**, 299-311.
- Kamei, M., Saunders, W. B., Bayless, K. J., Dye, L., Davis, G. E. and Weinstein, B. M. (2006). Endothelial tubes assemble from intracellular vacuoles in vivo. *Nature* **442**, 453-456.
- Kazanskaya, O., Glinka, A., del Barco Barrantes, I., Stannek, P., Niehrs, C. and Wu, W. (2004). R-Spondin2 is a secreted activator of Wnt/beta-catenin signaling and is required for Xenopus myogenesis. *Dev. Cell* **7**, 525-534.
- Kazanskaya, O., Ohkawara, B., Herault, M., Wu, W., Maltry, N., Augustin, H. G. and Niehrs, C. (2008). The Wnt signaling regulator R-spondin 3 promotes angioblast and vascular development. *Development* **135**, 3655-3664.
- Kim, K. A., Zhao, J., Andarmani, S., Kakitani, M., Oshima, T., Binnerts, M. E., Abo, A., Tomizuka, K. and Funk, W. D. (2006). R-Spondin proteins: a novel link to beta-catenin activation. *Cell Cycle* **5**, 23-26.
- Kim, K. A., Waggle, M., Tran, K., Zhan, X., Dixon, M. A., Liu, S., Gros, D., Korver, W., Yonkovich, S., Tomasevic, N. et al. (2008). R-Spondin family members regulate the Wnt pathway by a common mechanism. *Mol. Biol. Cell* **19**, 2588-2596.
- Kimmel, C. B., Ballard, W. W., Kimmel, S. R., Ullmann, B. and Schilling, T. F. (1995). Stages of embryonic development of the zebrafish. *Dev. Dyn.* **203**, 253-310.
- Kinzel, K. W., Nilbert, M. C., Su, L. K., Vogelstein, B., Bryan, T. M., Levy, D. B., Smith, K. J., Preisinger, A. C., Hedge, P., McKechnie, D. et al. (1991). Identification of FAP locus genes from chromosome 5q21. *Science* **253**, 661-665.
- Kwan, K. M., Fujimoto, E., Grabher, C., Mangum, B. D., Hardy, M. E., Campbell, D. S., Parant, J. M., Yost, H. J., Kanki, J. P. and Chien, C. B. (2007). The Tol2kit: a multisite gateway-based construction kit for Tol2 transposon transgenesis constructs. *Dev. Dyn.* **236**, 3088-3099.
- Laakkonen, P., Waltari, M., Holopainen, T., Takahashi, T., Pytowski, B., Steiner, P., Hicklin, D., Persaud, K., Tonra, J. R., Witte, L. et al. (2007). Vascular endothelial growth factor receptor 3 is involved in tumor angiogenesis and growth. *Cancer Res.* **67**, 593-599.
- Lawson, N. D., Scheer, N., Pham, V. N., Kim, C. H., Chitnis, A. B., Campos-Ortega, J. A. and Weinstein, B. M. (2001). Notch signaling is required for arterial-venous differentiation during embryonic vascular development. *Development* **128**, 3675-3683.
- Lawson, N. D., Mugford, J. W., Diamond, B. A. and Weinstein, B. M. (2003). phospholipase C gamma-1 is required downstream of vascular endothelial growth factor during arterial development. *Genes Dev.* **17**, 1346-1351.
- Lee, S., Chen, T. T., Barber, C. L., Jordan, M. C., Murdock, J., Desai, S., Ferrara, N., Nagy, A., Roos, K. P. and Iruela-Arispe, M. L. (2007). Autocrine VEGF signaling is required for vascular homeostasis. *Cell* **130**, 691-703.
- Liebner, S., Corada, M., Bangsow, T., Babbage, J., Taddei, A., Czupalla, C. J., Reis, M., Felici, A., Wolburg, H., Fruttiger, M. et al. (2008). Wnt/beta-catenin signaling controls development of the blood-brain barrier. *J. Cell Biol.* **183**, 409-417.
- Liu, C. and Nathans, J. (2008). An essential role for frizzled 5 in mammalian ocular development. *Development* **135**, 3567-3576.
- Lobov, I. B., Renard, R. A., Papadopoulos, N., Gale, N. W., Thurston, G., Yancopoulos, G. D. and Wiegand, S. J. (2007). Delta-like ligand 4 (Dll4) is induced by VEGF as a negative regulator of angiogenic sprouting. *Proc. Natl. Acad. Sci. USA* **104**, 3219-3224.
- Lohela, M., Helotera, H., Haiko, P., Dumont, D. J. and Alitalo, K. (2008). Transgenic induction of vascular endothelial growth factor-C is strongly angiogenic in mouse embryos but leads to persistent lymphatic hyperplasia in adult tissues. *Am. J. Pathol.* **173**, 1891-1901.
- Maretto, S., Cordenonsi, M., Dupont, S., Braghetta, P., Broccoli, V., Hassan, A. B., Volpin, D., Bressan, G. M. and Piccolo, S. (2003). Mapping Wnt/beta-catenin signaling during mouse development and in colorectal tumors. *Proc. Natl. Acad. Sci. USA* **100**, 3299-3304.
- Matsuura, M., Onimaru, M., Yonemitsu, Y., Suzuki, H., Nakano, T., Ishibashi, H., Shirasuna, K. and Sueishi, K. (2009). Autocrine loop between vascular endothelial growth factor (VEGF)-C and VEGF receptor-3 positively regulates tumor-associated lymphangiogenesis in oral squamous cancer cells. *Am. J. Pathol.* **175**, 1709-1721.
- Meijer, L., Skaltsounis, A. L., Magiatis, P., Polychronopoulos, P., Knockaert, M., Leost, M., Ryan, X. P., Vonica, C. A., Brivanlou, A., Dajani, R. et al. (2003). GSK-3-selective inhibitors derived from Tyrian purple indirubins. *Chem. Biol.* **10**, 1255-1266.



- Monkley, S. J., Delaney, S. J., Pennisi, D. J., Christiansen, J. H. and Wainwright, B. J. (1996). Targeted disruption of the Wnt2 gene results in placental defects. *Development* **122**, 3343-3353.
- Nam, J. S., Turcotte, T. J., Smith, P. F., Choi, S. and Yoon, J. K. (2006). Mouse cristin/R-spondin family proteins are novel ligands for the Frizzled 8 and LRP6 receptors and activate beta-catenin-dependent gene expression. *J. Biol. Chem.* **281**, 13247-13257.
- Nam, J. S., Turcotte, T. J. and Yoon, J. K. (2007). Dynamic expression of R-spondin family genes in mouse development. *Gene Expr. Patterns* **7**, 306-312.
- Ober, E. A., Olofsson, B., Makinen, T., Jin, S. W., Shoji, W., Koh, G. Y., Alitalo, K. and Stainier, D. Y. (2004). Vegfc is required for vascular development and endoderm morphogenesis in zebrafish. *EMBO Rep.* **5**, 78-84.
- Ober, E. A., Verkade, H., Field, H. A. and Stainier, D. Y. (2006). Mesodermal Wnt2b signalling positively regulates liver specification. *Nature* **442**, 688-691.
- Ohkawara, B., Glinka, A. and Niehrs, C. (2011). Rspo3 binds Syndecan 4 and induces Wnt/PCP signaling via clathrin-mediated endocytosis to promote morphogenesis. *Dev. Cell* **20**, 303-314.
- Olsson, A. K., Dimberg, A., Kreuger, J. and Claesson-Welsh, L. (2006). VEGF receptor signalling in control of vascular function. *Nat. Rev. Mol. Cell. Biol.* **7**, 359-371.
- Parsons, M. J., Pisharath, H., Yusuff, S., Moore, J. C., Siekmann, A. F., Lawson, N. and Leach, S. D. (2009). Notch-responsive cells initiate the secondary transition in larval zebrafish pancreas. *Mech. Dev.* **126**, 898-912.
- Polakis, P. (2007). The many ways of Wnt in cancer. *Curr. Opin. Genet. Dev.* **17**, 45-51.
- Provost, E., Rhee, J. and Leach, S. D. (2007). Viral 2A peptides allow expression of multiple proteins from a single ORF in transgenic zebrafish embryos. *Genesis* **45**, 625-629.
- Roca, C. and Adams, R. H. (2007). Regulation of vascular morphogenesis by Notch signaling. *Genes Dev.* **21**, 2511-2524.
- Roman, B. L., Pham, V. N., Lawson, N. D., Kulik, M., Childs, S., Lekven, A. C., Garrity, D. M., Moon, R. T., Fishman, M. C., Lechleider, R. J. et al. (2002). Disruption of acvrl1 increases endothelial cell number in zebrafish cranial vessels. *Development* **129**, 3009-3019.
- Rossant, J. and Howard, L. (2002). Signaling pathways in vascular development. *Annu. Rev. Cell Dev. Biol.* **18**, 541-573.
- Shtutman, M., Zhurinsky, J., Simcha, I., Albanese, C., D'Amico, M., Pestell, R. and Ben-Ze'ev, A. (1999). The cyclin D1 gene is a target of the beta-catenin/LEF-1 pathway. *Proc. Natl. Acad. Sci. USA* **96**, 5522-5527.
- Shu, W., Jiang, Y. Q., Lu, M. M. and Morrissey, E. E. (2002). Wnt7b regulates mesenchymal proliferation and vascular development in the lung. *Development* **129**, 4831-4842.
- Siegfried, G., Basak, A., Cromlish, J. A., Benjannet, S., Marcinkiewicz, J., Chretien, M., Seidah, N. G. and Khatib, A. M. (2003). The secretory proprotein convertases furin, PC5, and PC7 activate VEGF-C to induce tumorigenesis. *J. Clin. Invest.* **111**, 1723-1732.
- Siekmann, A. F. and Lawson, N. D. (2007). Notch signalling limits angiogenic cell behaviour in developing zebrafish arteries. *Nature* **445**, 781-784.
- Skurk, C., Maatz, H., Rocnik, E., Bialik, A., Force, T. and Walsh, K. (2005). Glycogen-Synthase Kinase3beta/beta-catenin axis promotes angiogenesis through activation of vascular endothelial growth factor signaling in endothelial cells. *Circ. Res.* **96**, 308-318.
- Srinivas, B. P., Woo, J., Leong, W. Y. and Roy, S. (2007). A conserved molecular pathway mediates myoblast fusion in insects and vertebrates. *Nat. Genet.* **39**, 781-786.
- Stacker, S. A., Achen, M. G., Jussila, L., Baldwin, M. E. and Alitalo, K. (2002). Lymphangiogenesis and cancer metastasis. *Nat. Rev. Cancer* **2**, 573-583.
- Stefater, J. A., 3rd, Lewkowich, I., Rao, S., Mariggi, G., Carpenter, A. C., Burr, A. R., Fan, J., Ajima, R., Molkentin, J. D., Williams, B. O. et al. (2011). Regulation of angiogenesis by a non-canonical Wnt-Flt1 pathway in myeloid cells. *Nature* **474**, 511-515.
- Stenman, J. M., Rajagopal, J., Carroll, T. J., Ishibashi, M., McMahon, J. and McMahon, A. P. (2008). Canonical Wnt signaling regulates organ-specific assembly and differentiation of CNS vasculature. *Science* **322**, 1247-1250.
- Tammela, T., Zarkada, G., Wallgard, E., Murtomaki, A., Suchting, S., Wirzenius, M., Waltari, M., Hellstrom, M., Schomber, T., Peltonen, R. et al. (2008). Blocking VEGFR-3 suppresses angiogenic sprouting and vascular network formation. *Nature* **454**, 656-660.
- Villefranc, J. A., Amigo, J. and Lawson, N. D. (2007). Gateway compatible vectors for analysis of gene function in the zebrafish. *Dev. Dyn.* **236**, 3077-3087.
- Wang, H., Gilner, J. B., Bautch, V. L., Wang, D. Z., Wainwright, B. J., Kirby, S. L. and Patterson, C. (2007). Wnt2 coordinates the commitment of mesoderm to hematopoietic, endothelial, and cardiac lineages in embryoid bodies. *J. Biol. Chem.* **282**, 782-791.
- Wei, Q., Yokota, C., Semenov, M. V., Doble, B., Woodgett, J. and He, X. (2007). R-spondin1 is a high affinity ligand for LRP6 and induces LRP6 phosphorylation and beta-catenin signaling. *J. Biol. Chem.* **282**, 15903-15911.
- Weinstein, B. M., Stemple, D. L., Driever, W. and Fishman, M. C. (1995). Gridlock, a localized heritable vascular patterning defect in the zebrafish. *Nat. Med.* **1**, 1143-1147.
- Westerfield, M. (2000). *The Zebrafish Book: A Guide for Laboratory Use of Zebrafish* (Danio rerio). Eugene, OR: University of Oregon Press.
- Xu, Q., Wang, Y., Dabdoub, A., Smallwood, P. M., Williams, J., Woods, C., Kelley, M. W., Jiang, L., Tasman, W., Zhang, K. et al. (2004). Vascular development in the retina and inner ear: control by Norrin and Frizzled-4, a high-affinity ligand-receptor pair. *Cell* **116**, 883-895.
- Yanai, N., Satoh, T. and Obinata, M. (1991). Endothelial cells create a hematopoietic inductive microenvironment preferential to erythropoiesis in the mouse spleen. *Cell Struct. Funct.* **16**, 87-93.
- Ye, X., Wang, Y., Cahill, H., Yu, M., Badea, T. C., Smallwood, P. M., Peachey, N. S. and Nathans, J. (2009). Norrin, frizzled-4, and Lrp5 signaling in endothelial cells controls a genetic program for retinal vascularization. *Cell* **139**, 285-298.
- Zerlin, M., Julius, M. A. and Kitajewski, J. (2008). Wnt/Frizzled signaling in angiogenesis. *Angiogenesis* **11**, 63-69.
- Zhang, X., Gaspard, J. P. and Chung, D. C. (2001). Regulation of vascular endothelial growth factor by the Wnt and K-ras pathways in colonic neoplasia. *Cancer Res.* **61**, 6050-6054.
